# Supplementary material for: Transcriptomic Characterization of Miscanthus sacchariflorus × M. lutarioriparius and Its Implications for Energy Crop Development in the Semiarid Mine Area
Source: MDPI journal article supplement (doi:10.3390/plants11121568), 2022-06-14
Supplement: s1 [file s1]

**Table S3.** The Metabolism Pathways Annotations and Up-down Regulated Differential Genes in Three Groups

| Pathway<br>of A<br>class | Pathway<br>of B<br>class                 | pathway<br>ID | Pathway of C class                                | DEG3                                      |                                             | Pathway of C<br>class                       | DEG1                                      |                                             | Pathway of C<br>class                       | DEG2                                     |                                             |
|--------------------------|------------------------------------------|---------------|---------------------------------------------------|-------------------------------------------|---------------------------------------------|---------------------------------------------|-------------------------------------------|---------------------------------------------|---------------------------------------------|------------------------------------------|---------------------------------------------|
|                          |                                          |               |                                                   | The<br>number of<br>upregulate<br>d genes | The<br>number of<br>downregul<br>ated genes |                                             | The<br>number of<br>upregulate<br>d genes | The number<br>of<br>downregulat<br>ed genes |                                             | The number<br>of<br>upregulated<br>genes | The number<br>of<br>downregulat<br>ed genes |
| 1.<br>Metaboli<br>sm     | 1.0 Global<br>and<br>overview<br>maps    | ath01230      | Biosynthesis of<br>amino acids                    | 16                                        | 16                                          | —                                           | —                                         | —                                           | —                                           | —                                        | —                                           |
|                          |                                          | ath01110      | Biosynthesis of<br>secondary<br>metabolites       | 90                                        | 74                                          | Biosynthesis<br>of secondary<br>metabolites | 3                                         | 1                                           | Biosynthesis of<br>secondary<br>metabolites | 2                                        | 0                                           |
|                          |                                          | ath01200      | Carbon<br>metabolism                              | 10                                        | 18                                          | —                                           | —                                         | —                                           | —                                           | —                                        | —                                           |
|                          |                                          | ath01212      | Fatty acid<br>metabolism                          | 9                                         | 2                                           | Fatty acid<br>metabolism                    | 1                                         | 1                                           | Fatty acid<br>metabolism                    | 1                                        | 1                                           |
|                          |                                          | ath01100      | Metabolic<br>pathways                             | 144                                       | 117                                         | Metabolic<br>pathways                       | 4                                         | 2                                           | Metabolic<br>pathways                       | 1                                        | 1                                           |
|                          | 1.1 Carbohy<br>-drate<br>metaboli<br>-sm | ath00520      | Amino sugar and<br>nucleotide sugar<br>metabolism | 6                                         | 5                                           | —                                           | —                                         | —                                           | —                                           | —                                        | —                                           |
|                          |                                          | ath00010      | Glycolysis /<br>Gluconeogenesis                   | 4                                         | 7                                           | —                                           | —                                         | —                                           | —                                           | —                                        | —                                           |
|                          |                                          | ath00630      | Glyoxylate and<br>dicarboxylate<br>metabolism-    | 3                                         | 7                                           | —                                           | —                                         | —                                           | —                                           | —                                        | —                                           |

|                         |          |                                         |   |    |                               |   |   |                               |   |   |
|-------------------------|----------|-----------------------------------------|---|----|-------------------------------|---|---|-------------------------------|---|---|
|                         | ath00640 | Propanoate metabolism-                  | 7 | 2  | —                             | — | — | —                             | — | — |
|                         | ath00230 | Purine metabolism-                      | 5 | 6  | —                             | — | — | —                             | — | — |
|                         | ath00620 | Pyruvate metabolism                     | 4 | 4  | —                             | — | — | —                             | — | — |
|                         | ath00500 | Starch and sucrose metabolism           | 6 | 17 | Starch and sucrose metabolism | 2 | 0 | Starch and sucrose metabolism | 2 | 0 |
| 1.2                     |          |                                         |   |    |                               |   |   |                               |   |   |
| Energy metabolism-sm    | ath00920 | Sulfur metabolism                       | 3 | 4  | —                             | — | — | —                             | — | — |
| 1.3 Lipid metabolism-sm | ath00592 | alpha-Linolenic acid metabolism         | 3 | 4  | —                             | — | — | —                             | — | — |
|                         | ath01040 | Biosynthesis of unsaturated fatty acids | 3 | 1  | —                             | — | — | —                             | — | — |
|                         | ath00061 | Fatty acid biosynthesis                 | 6 | 0  | —                             | — | — | —                             | — | — |
|                         | ath00071 | Fatty acid degradation                  | 6 | 1  | —                             | — | — | —                             | — | — |
|                         | ath00062 | Fatty acid elongation                   | 2 | 3  | Fatty acid elongation         | 1 | 1 | Fatty acid elongation         | 4 | 2 |

|                                         |          |                                                   |    |   |                         |   |   |                                 |   |   |
|-----------------------------------------|----------|---------------------------------------------------|----|---|-------------------------|---|---|---------------------------------|---|---|
|                                         | ath00100 | Steroid<br>biosynthesis                           | 2  | 3 | Steroid<br>biosynthesis | 0 | 1 |                                 |   |   |
|                                         | ath00250 | Arginine and<br>proline<br>metabolism             | 5  | 3 | —                       | — | — | —                               | — | — |
|                                         | ath00330 | Alanine, aspartate<br>and glutamate<br>metabolism | 4  | 2 | —                       | — | — | —                               | — | — |
|                                         | ath00270 | Cysteine and<br>methionine<br>metabolism          | 9  | 5 | —                       | — | — | —                               | — | — |
| 1.5<br>Amino<br>acid<br>metaboli<br>-sm |          |                                                   |    |   | —                       | — | — | <b>Histidine<br/>metabolism</b> | 0 | 1 |
|                                         | ath00260 | Glycine, serine and<br>threonine<br>metabolism    | 4  | 9 | —                       | — | — | —                               | — | — |
|                                         | ath00360 | Phenylalanine<br>metabolism                       | 12 | 2 | —                       | — | — | —                               | — | — |
|                                         | ath00380 | Tryptophan<br>metabolism                          | 8  | 1 | —                       | — | — | —                               | — | — |
|                                         | ath00350 | Tyrosine<br>metabolism                            | 5  | 2 | —                       | — | — | —                               | — | — |
|                                         | ath00280 | Valine, leucine and<br>isoleucine<br>degradation  | 4  | 2 | —                       | — | — | —                               | — | — |

|                                             |          |                                                     |    |   |   |   |   |                                  |   |   |
|---------------------------------------------|----------|-----------------------------------------------------|----|---|---|---|---|----------------------------------|---|---|
| 1.6                                         | ath00410 | beta-Alanine metabolism                             | 4  | 5 | — | — | — | —                                | — | — |
| Metabolism of other amino acids             | ath00460 | Cyanoamino acid metabolism                          | 5  | 7 | — | — | — | Cyanoamino acid metabolism       | 5 | 3 |
|                                             | ath00480 | Glutathione metabolism                              | 14 | 6 | — | — | — | —                                | — | — |
|                                             | ath00450 | Selenocompound metabolism                           | 3  | 1 | — | — | — | —                                | — | — |
| 1.8Metabolism of cofactors and vitamins     | ath00760 | Nicotinate and nicotinamide metabolism              | 1  | 2 | — | — | — | —                                | — | — |
|                                             | —        | —                                                   | —  | — | — | — | — | <b>One carbon pool by folate</b> | 2 | 0 |
|                                             | ath00130 | Ubiquinone and other terpenoid-quinone biosynthesis | 12 | 2 | — | — | — | —                                | — | — |
| 1.9Metabolism of terpenoids and polyketides | ath00906 | Carotenoid biosynthesis                             | 2  | 3 | — | — | — | —                                | — | — |
|                                             | ath00902 | Monoterpenoid biosynthesis                          | 3  | 0 | — | — | — | Monoterpenoid biosynthesis       | 1 | 0 |
| 1.10 Biosynthesis                           | ath00941 | Flavonoid biosynthesis                              | 17 | 3 | — | — | — | —                                | — | — |

|                                                          |                                         |          |                                                                 |    |   |                   |   |   |                                 |   |   |
|----------------------------------------------------------|-----------------------------------------|----------|-----------------------------------------------------------------|----|---|-------------------|---|---|---------------------------------|---|---|
|                                                          | is of other<br>secondary<br>metabolites | ath00950 | Isoquinoline<br>alkaloid<br>biosynthesis                        | 4  | 2 | —                 | — | — | —                               | — | — |
|                                                          |                                         | ath00940 | Phenylpropanoid<br>biosynthesis                                 | 28 | 5 | —                 | — | — | Phenylpropanoid<br>biosynthesis | 2 | 0 |
|                                                          |                                         | ath00945 | Stilbenoid,<br>diarylheptanoid<br>and gingerol<br>biosynthesis  | 4  | 1 | —                 | — | — | —                               | — | — |
|                                                          |                                         | ath00960 | Tropane,<br>piperidine and<br>pyridine alkaloid<br>biosynthesis | 4  | 2 | —                 | — | — | —                               | — | — |
| 2.<br>Genetic<br>Informat<br>ion<br>Processi<br>ng       | 2.1Trans<br>cription                    | ath03020 | RNA polymerase                                                  | 3  | 7 | RNA<br>polymerase | 1 | 0 | —                               | — | — |
|                                                          | 2.4                                     | ath03030 | DNA replication                                                 | 3  | 3 | —                 | — | — | —                               | — | — |
|                                                          | Replication<br>and repair               | ath03430 | Mismatch repair                                                 | 2  | 3 | —                 | — | — | —                               | — | — |
| 3.Enviro<br>nmental<br>Informat<br>ion<br>Processi<br>ng | 3.2                                     | ath04016 | MAPK signaling<br>pathway - plant                               | 9  | 4 | —                 | — | — | —                               | — | — |
|                                                          | Signal<br>transduc<br>-tion             | ath04075 | Plant hormone<br>signal transduction                            | 13 | 9 | —                 | — | — | —                               | — | — |

|                       |                                 |          |                            |    |   |   |   |   |                        |   |   |
|-----------------------|---------------------------------|----------|----------------------------|----|---|---|---|---|------------------------|---|---|
| 4.Cellular Processes  | 4.1                             | ath04146 | Peroxisome                 | 12 | 5 | — | — | — | —                      | — | — |
|                       | Transport and catabolism        | ath04145 | Phagosome                  | 2  | 7 | — | — | — | —                      | — | — |
| 5. Organismal Systems | 5.10Envi ronment al adaptatio n | ath04712 | Circadian rhythm - plant   | 6  | 2 | — | — | — | Circadian rhythm-plant | 1 | 0 |
|                       |                                 | ath04626 | Plant-pathogen interaction | 13 | 4 | — | — | — | —                      | — | — |
