# Supplementary material for: Transcriptomic Characterization of Miscanthus sacchariflorus × M. lutarioriparius and Its Implications for Energy Crop Development in the Semiarid Mine Area
Source: MDPI journal article supplement (doi:10.3390/plants11121568), 2022-06-14
Supplement: s1 [file s1]

**Table S2.** List of Gene Differential Expression Multiples of Three Groups of Differential Genes

| Genes ID    | DEG1 (F1 VS <i>M.sacchariflorus</i> ) |            | DEG2 (F1 VS <i>M.lutarioriparius</i> ) |            | DEG3 ( <i>M.sacchariflorus</i> VS <i>M.lutarioriparius</i> ) |            | notes                  |
|-------------|---------------------------------------|------------|----------------------------------------|------------|--------------------------------------------------------------|------------|------------------------|
|             | log2(FoldChange)                      | Regulation | log2(FoldChange)                       | Regulation | log2(FoldChange)                                             | Regulation |                        |
| K41_C316020 | -1.310712759                          | down       | 6.210400498                            | up         | 7.894091613                                                  | up         | Shared gene            |
| MluLR5042   | -1.134759322                          | down       | 1.207996123                            | up         | 2.377303044                                                  | up         | Shared gene            |
| K41_C314568 | -1.106776896                          | down       | 3.795597058                            | up         | 5.116595396                                                  | up         | Shared gene            |
| MluLR17506  | -3.018267179                          | down       | -1.386026048                           | down       | 1.618657177                                                  | up         | Shared gene            |
| MluLR7864   | 2.653612163                           | up         | -1.59550086                            | down       | -4.534463024                                                 | down       | Shared gene            |
| MluLR3275   | 4.901128752                           | up         | -1.033135479                           | down       | -6.716931891                                                 | down       | Shared gene            |
| K41_C234516 | -2.467297676                          | down       | —                                      | —          | 3.906518874                                                  | up         | Special gene in female |
| K41_C293894 | -1.999383638                          | down       | —                                      | —          | 5.846984104                                                  | up         | Special gene in female |
| MluLR9293   | -3.582257016                          | down       | —                                      | —          | 4.330865357                                                  | up         | Special gene in female |
| MluLR14171  | -2.660586136                          | down       | —                                      | —          | 2.920393234                                                  | up         | Special gene in female |
| K41_C312250 | -2.640868129                          | down       | —                                      | —          | 2.947430247                                                  | up         | Special gene in female |
| K41_C315280 | -1.731277353                          | down       | —                                      | —          | 3.031240453                                                  | up         | Special gene in female |
| MluLR10849  | -1.719890672                          | down       | —                                      | —          | 2.533910335                                                  | up         | Special gene in female |

| Genes ID   | DEG1 (F1 VS <i>M.sacchariflorus</i> ) |            | DEG2 (F1 VS <i>M.lutarioriparius</i> ) |            | DEG3 ( <i>M.sacchariflorus</i> VS <i>M.lutarioriparius</i> ) |            | notes                  |
|------------|---------------------------------------|------------|----------------------------------------|------------|--------------------------------------------------------------|------------|------------------------|
|            | log2(FoldChange)                      | Regulation | log2(FoldChange)                       | Regulation | log2(FoldChange)                                             | Regulation |                        |
| MluLR7765  | -1.327309567                          | down       | ——                                     | ——         | 1.983842989                                                  | up         | Special gene in female |
| MluLR9600  | 1.531903716                           | up         | ——                                     | ——         | -2.232163456                                                 | down       | Special gene in female |
| MluLR1095  | 1.962500737                           | up         | ——                                     | ——         | -2.302934658                                                 | down       | Special gene in female |
| MluLR1136  | 2.202262544                           | up         | ——                                     | ——         | -2.677583045                                                 | down       | Special gene in female |
| MluLR8565  | 2.620413984                           | up         | ——                                     | ——         | -3.26452968                                                  | down       | Special gene in female |
| MluLR522   | 2.768744757                           | up         | ——                                     | ——         | -3.114343886                                                 | down       | Special gene in female |
| MluLR866   | 2.835889981                           | up         | ——                                     | ——         | -3.392799407                                                 | down       | Special gene in female |
| MluLR7052  | 2.868002423                           | up         | ——                                     | ——         | -3.836759967                                                 | down       | Special gene in female |
| MluLR5589  | 3.004559452                           | up         | ——                                     | ——         | -4.409667274                                                 | down       | Special gene in female |
| MluLR11938 | 3.009790294                           | up         | ——                                     | ——         | -3.722479591                                                 | down       | Special gene in female |
| MluLR12032 | 3.034736934                           | up         | ——                                     | ——         | -3.700377543                                                 | down       | Special gene in female |

| Genes ID   | DEG1 (F1 VS <i>M.sacchariflorus</i> ) |            | DEG2 (F1 VS <i>M.lutarioriparius</i> ) |            | DEG3 ( <i>M.sacchariflorus</i> VS <i>M.lutarioriparius</i> ) |            | notes                  |
|------------|---------------------------------------|------------|----------------------------------------|------------|--------------------------------------------------------------|------------|------------------------|
|            | log2(FoldChange)                      | Regulation | log2(FoldChange)                       | Regulation | log2(FoldChange)                                             | Regulation |                        |
| MluLR173   | 3.085295742                           | up         | —                                      | —          | -4.484100601                                                 | down       | Special gene in female |
| MluLR547   | 3.184687715                           | up         | —                                      | —          | -4.523585149                                                 | down       | Special gene in female |
| MluLR14284 | 3.262087745                           | up         | —                                      | —          | -3.807535039                                                 | down       | Special gene in female |
| MluLR4295  | 3.694526265                           | up         | —                                      | —          | -4.918811601                                                 | down       | Special gene in female |
| MluLR4430  | 3.697432047                           | up         | —                                      | —          | -5.014681131                                                 | down       | Special gene in female |
| MluLR10658 | 3.96448026                            | up         | —                                      | —          | -4.574209078                                                 | down       | Special gene in female |
| MluLR16622 | 4.187043391                           | up         | —                                      | —          | -5.094321356                                                 | down       | Special gene in female |
| MluLR12926 | 4.34834363                            | up         | —                                      | —          | -4.723583903                                                 | down       | Special gene in female |
| MluLR7800  | 4.628757594                           | up         | —                                      | —          | -6.455196979                                                 | down       | Special gene in female |
| MluLR13074 | 5.124462195                           | up         | —                                      | —          | -5.613101069                                                 | down       | Special gene in female |
| MluLR9925  | 5.181407175                           | up         | —                                      | —          | -6.151757592                                                 | down       | Special gene in female |

| Genes ID   | DEG1 (F1 VS <i>M.sacchariflorus</i> ) |            | DEG2 (F1 VS <i>M.lutarioriparius</i> ) |            | DEG3 ( <i>M.sacchariflorus</i> VS <i>M.lutarioriparius</i> ) |            | notes                  |
|------------|---------------------------------------|------------|----------------------------------------|------------|--------------------------------------------------------------|------------|------------------------|
|            | log2(FoldChange)                      | Regulation | log2(FoldChange)                       | Regulation | log2(FoldChange)                                             | Regulation |                        |
| MluLR8018  | 5.315341345                           | up         | —                                      | —          | -6.879088338                                                 | down       | Special gene in female |
| MluLR863   | 5.86104175                            | up         | —                                      | —          | -7.409988854                                                 | down       | Special gene in female |
| MluLR10478 | 6.176455702                           | up         | —                                      | —          | -7.195964028                                                 | down       | Special gene in female |
| MluLR11561 | —                                     | —          | -2.519564614                           | down       | -4.308497635                                                 | down       | Special gene in male   |
| MluLR8367  | —                                     | —          | -1.454118256                           | down       | -4.451498976                                                 | down       | Special gene in male   |
| MluLR8818  | —                                     | —          | -1.417877597                           | down       | -3.509151551                                                 | down       | Special gene in male   |
| MluLR13134 | —                                     | —          | -1.235348518                           | down       | -2.408920686                                                 | down       | Special gene in male   |
| MluLR7989  | —                                     | —          | -1.224506666                           | down       | -1.947200315                                                 | down       | Special gene in male   |
| MluLR5039  | —                                     | —          | -1.179279053                           | down       | -1.954943223                                                 | down       | Special gene in male   |
| MluLR12920 | —                                     | —          | -1.171837288                           | down       | -2.914360594                                                 | down       | Special gene in male   |
| MluLR13656 | —                                     | —          | -1.142505676                           | down       | -2.944666935                                                 | down       | Special gene in male   |

| Genes ID            | DEG1 (F1 VS <i>M.sacchariflorus</i> ) |            | DEG2 (F1 VS <i>M.lutarioriparius</i> ) |            | DEG3 ( <i>M.sacchariflorus</i> VS <i>M.lutarioriparius</i> ) |            | notes                |
|---------------------|---------------------------------------|------------|----------------------------------------|------------|--------------------------------------------------------------|------------|----------------------|
|                     | log2(FoldChange)                      | Regulation | log2(FoldChange)                       | Regulation | log2(FoldChange)                                             | Regulation |                      |
| K41_scaffold13579   | —                                     | —          | 1.310948261                            | up         | 1.630580575                                                  | up         | Special gene in male |
| Cap3i95_Contig32036 | —                                     | —          | 1.361092931                            | up         | 1.587620729                                                  | up         | Special gene in male |
| Cap3i94_Contig4783  | —                                     | —          | 1.411582504                            | up         | 2.395017543                                                  | up         | Special gene in male |
| K41_scaffold1343    | —                                     | —          | 1.422305257                            | up         | 2.507670222                                                  | up         | Special gene in male |
| K41_scaffold1865    | —                                     | —          | 1.484796406                            | up         | 2.35984742                                                   | up         | Special gene in male |
| Cap3i94_Contig4598  | —                                     | —          | 1.680471097                            | up         | 2.3759353                                                    | up         | Special gene in male |
| K41_C316852         | —                                     | —          | 1.704902246                            | up         | 1.274974515                                                  | up         | Special gene in male |
| MluLR7657           | —                                     | —          | 1.764699655                            | up         | 2.323282252                                                  | up         | Special gene in male |
| Cap3i94_Contig3416  | —                                     | —          | 1.845008878                            | up         | 2.981480289                                                  | up         | Special gene in male |
| MluLR15067          | —                                     | —          | 1.902757151                            | up         | 3.162190831                                                  | up         | Special gene in male |
| K41_scaffold14908   | —                                     | —          | 1.961047524                            | up         | 2.524477436                                                  | up         | Special gene in male |

| Genes ID            | DEG1 (F1 VS <i>M.sacchariflorus</i> ) |            | DEG2 (F1 VS <i>M.lutarioriparius</i> ) |            | DEG3 ( <i>M.sacchariflorus</i> VS <i>M.lutarioriparius</i> ) |            | notes                |
|---------------------|---------------------------------------|------------|----------------------------------------|------------|--------------------------------------------------------------|------------|----------------------|
|                     | log2(FoldChange)                      | Regulation | log2(FoldChange)                       | Regulation | log2(FoldChange)                                             | Regulation |                      |
| Cap3i97_Contig2585  | —                                     | —          | 1.970469177                            | up         | 2.497857506                                                  | up         | Special gene in male |
| Cap3i94_Contig28339 | —                                     | —          | 2.014524382                            | up         | 2.277640184                                                  | up         | Special gene in male |
| K61_scaffold3236    | —                                     | —          | 2.113558929                            | up         | 2.958379626                                                  | up         | Special gene in male |
| MluLR1093           | —                                     | —          | 2.272019255                            | up         | 2.933764132                                                  | up         | Special gene in male |
| K51_scaffold12551   | —                                     | —          | 2.593865838                            | up         | 3.435471282                                                  | up         | Special gene in male |
| K41_scaffold13483   | —                                     | —          | 2.611655173                            | up         | 3.302503281                                                  | up         | Special gene in male |
| K51_scaffold12750   | —                                     | —          | 2.622661891                            | up         | 3.318228227                                                  | up         | Special gene in male |
| K51_C245430         | —                                     | —          | 2.631147036                            | up         | 3.975537724                                                  | up         | Special gene in male |
| MluLR8595           | —                                     | —          | 2.838171278                            | up         | 2.646369957                                                  | up         | Special gene in male |
| K41_C317200         | —                                     | —          | 2.885646422                            | up         | 3.772971622                                                  | up         | Special gene in male |
| K41_scaffold2760    | —                                     | —          | 2.907625187                            | up         | 2.927164006                                                  | up         | Special gene in male |

| Genes ID           | DEG1 (F1 VS <i>M.sacchariflorus</i> ) |            | DEG2 (F1 VS <i>M.lutarioriparius</i> ) |            | DEG3 ( <i>M.sacchariflorus</i> VS <i>M.lutarioriparius</i> ) |            | notes                |
|--------------------|---------------------------------------|------------|----------------------------------------|------------|--------------------------------------------------------------|------------|----------------------|
|                    | log2(FoldChange)                      | Regulation | log2(FoldChange)                       | Regulation | log2(FoldChange)                                             | Regulation |                      |
| MluLR3385          | —                                     | —          | 2.915141257                            | up         | 3.795654281                                                  | up         | Special gene in male |
| MluLR16240         | —                                     | —          | 3.132804182                            | up         | 4.081445375                                                  | up         | Special gene in male |
| K41_scaffold9209   | —                                     | —          | 3.356017732                            | up         | 3.983372537                                                  | up         | Special gene in male |
| MluLR7808          | —                                     | —          | 3.418072787                            | up         | 4.238508046                                                  | up         | Special gene in male |
| MluLR1137          | —                                     | —          | 3.803629542                            | up         | 4.946398817                                                  | up         | Special gene in male |
| Cap3i94_Contig5243 | —                                     | —          | 3.817698096                            | up         | 5.461881175                                                  | up         | Special gene in male |
| K41_scaffold8733   | —                                     | —          | 3.942657081                            | up         | 4.060251694                                                  | up         | Special gene in male |
| MluLR9531          | —                                     | —          | 4.001188839                            | up         | 4.622841112                                                  | up         | Special gene in male |
| MluLR4601          | —                                     | —          | 4.381250266                            | up         | 6.943004662                                                  | up         | Special gene in male |
| Cap3i94_Contig3566 | —                                     | —          | 4.755337989                            | up         | 6.004998228                                                  | up         | Special gene in male |
| K41_scaffold16362  | —                                     | —          | 4.793801101                            | up         | 5.980813882                                                  | up         | Special gene in male |

| Genes ID           | DEG1 (F1 VS <i>M.sacchariflorus</i> ) |            | DEG2 (F1 VS <i>M.lutarioriparius</i> ) |            | DEG3 ( <i>M.sacchariflorus</i> VS <i>M.lutarioriparius</i> ) |            | notes                |
|--------------------|---------------------------------------|------------|----------------------------------------|------------|--------------------------------------------------------------|------------|----------------------|
|                    | log2(FoldChange)                      | Regulation | log2(FoldChange)                       | Regulation | log2(FoldChange)                                             | Regulation |                      |
| Cap3i94_Contig5885 | —                                     | —          | 5.073914834                            | up         | 5.96013965                                                   | up         | Special gene in male |
| MluLR7772          | —                                     | —          | 5.410270836                            | up         | 6.700246247                                                  | up         | Special gene in male |
| K61_C140346        | —                                     | —          | 5.888314699                            | up         | 7.135694261                                                  | up         | Special gene in male |
| Cap3i94_Contig5889 | —                                     | —          | 5.98504523                             | up         | 7.654340148                                                  | up         | Special gene in male |
| K41_scaffold15739  | —                                     | —          | 6.055356158                            | up         | 7.744241047                                                  | up         | Special gene in male |
| MluLR7047          | —                                     | —          | 6.357827388                            | up         | 7.117399267                                                  | up         | Special gene in male |
| Cap3i94_Contig5645 | —                                     | —          | 6.885703871                            | up         | 7.734530695                                                  | up         | Special gene in male |
| K61_C145926        | —                                     | —          | 7.171568049                            | up         | 6.959085157                                                  | up         | Special gene in male |
