# Supplementary material for: Transcriptomic Characterization of Miscanthus sacchariflorus × M. lutarioriparius and Its Implications for Energy Crop Development in the Semiarid Mine Area
Source: MDPI journal article supplement (doi:10.3390/plants11121568), 2022-06-14
Supplement: s1 [file s1]

**Table S1.** The RNAseq data after being filtered and trimmed

| Samples          | Length of read (bp) | Number of reads sequenced | Number of reads with quality>20 | Single-ended kept data volume (Gb) | Total G     |
|------------------|---------------------|---------------------------|---------------------------------|------------------------------------|-------------|
| 1-1-1_clean_R1   | 91                  | 44488440                  | 43734360.94                     | 1.99386066                         | 3.979826846 |
| 1-1-1_clean_R2   | 91                  |                           |                                 | 1.985966186                        |             |
| 1-12-3_clean_R1  | 91                  | 39420746                  | 38870826.59                     | 1.768353563                        | 3.53724522  |
| 1-12-3_clean_R2  | 91                  |                           |                                 | 1.768891657                        |             |
| 1-2-2_clean_R1   | 91                  | 53759084                  | 53095159.31                     | 2.421822543                        | 4.831659497 |
| 1-2-2_clean_R2   | 91                  |                           |                                 | 2.409836955                        |             |
| 1-3-3_clean_R1   | 91                  | 49616792                  | 48788191.57                     | 2.224603601                        | 4.439725433 |
| 1-3-3_clean_R2   | 91                  |                           |                                 | 2.215121832                        |             |
| 1-5-1_clean_R1   | 91                  | 54033274                  | 53220073.23                     | 2.42384892                         | 4.843026664 |
| 1-5-1_clean_R2   | 91                  |                           |                                 | 2.419177744                        |             |
| 1-6-3_clean_R1   | 91                  | 53094126                  | 52284440.58                     | 2.384135979                        | 4.757884093 |
| 1-6-3_clean_R2   | 91                  |                           |                                 | 2.373748113                        |             |
| 1-7-1_clean_R1   | 91                  | 45223950                  | 44477754.83                     | 2.028470531                        | 4.047475689 |
| 1-7-1_clean_R2   | 91                  |                           |                                 | 2.019005158                        |             |
| 10-1-1_clean_R1  | 91                  | 52775432                  | 52010188.24                     | 2.369104975                        | 4.732927129 |
| 10-1-1_clean_R2  | 91                  |                           |                                 | 2.363822154                        |             |
| 10-11-1_clean_R1 | 91                  | 48577526                  | 47810001.09                     | 2.179775604                        | 4.350710099 |
| 10-11-1_clean_R2 | 91                  |                           |                                 | 2.170934495                        |             |
| 10-16-1_clean_R1 | 91                  | 36791758                  | 36306106.79                     | 1.653267079                        | 3.303855718 |
| 10-16-1_clean_R2 | 91                  |                           |                                 | 1.650588639                        |             |
| 10-2-1_clean_R1  | 91                  | 59405176                  | 58475485                        | 2.66428353                         | 5.321269135 |
| 10-2-1_clean_R2  | 91                  |                           |                                 | 2.656985604                        |             |
| 10-3-3_clean_R1  | 91                  | 52834706                  | 52044827.15                     | 2.373688986                        | 4.73607927  |
| 10-3-3_clean_R2  | 91                  |                           |                                 | 2.362390284                        |             |
| 10-4-1_clean_R1  | 91                  | 81292020                  | 79979153.88                     | 3.645524378                        | 7.278103003 |
| 10-4-1_clean_R2  | 91                  |                           |                                 | 3.632578624                        |             |
| 10-6-2_clean_R1  | 91                  | 52599142                  | 51728626.2                      | 2.357362047                        | 4.707304984 |
| 10-6-2_clean_R2  | 91                  |                           |                                 | 2.349942938                        |             |
| 11-1-2_clean_R1  | 91                  | 45657504                  | 44926983.94                     | 2.04687841                         | 4.088355538 |
| 11-1-2_clean_R2  | 91                  |                           |                                 | 2.041477128                        |             |
| 11-2-1_clean_R1  | 91                  | 62345918                  | 61370204.38                     | 2.79560655                         | 5.584688599 |
| 11-2-1_clean_R2  | 91                  |                           |                                 | 2.789082049                        |             |
| 11-3-1_clean_R1  | 91                  | 55018164                  | 54124118.84                     | 2.467278561                        | 4.925294814 |
| 11-3-1_clean_R2  | 91                  |                           |                                 | 2.458016253                        |             |
| 11-4-2_clean_R1  | 91                  | 45801464                  | 45052610.06                     | 2.054582683                        | 4.099787516 |
| 11-4-2_clean_R2  | 91                  |                           |                                 | 2.045204833                        |             |
| 11-7-1_clean_R1  | 91                  | 53743888                  | 52905483.35                     | 2.412579255                        | 4.814398985 |
| 11-7-1_clean_R2  | 91                  |                           |                                 | 2.401819729                        |             |
| 12-1-2_clean_R1  | 91                  | 57055344                  | 56156722.33                     | 2.559414296                        | 5.110261732 |

| Samples          | Length of read (bp) | Number of reads sequenced | Number of reads with quality>20 | Single-ended kept data volume (Gb) | Total G     |
|------------------|---------------------|---------------------------|---------------------------------|------------------------------------|-------------|
| 12-1-2_clean_R2  | 91                  |                           |                                 | 2.550847436                        |             |
| 12-2-3_clean_R1  | 91                  | 49518306                  | 48758200                        | 2.225370003                        | 4.4369962   |
| 12-2-3_clean_R2  | 91                  |                           |                                 | 2.211626197                        |             |
| 12-4-1_clean_R1  | 91                  | 53836794                  | 53072311.53                     | 2.417729663                        | 4.829580349 |
| 12-4-1_clean_R2  | 91                  |                           |                                 | 2.411850685                        |             |
| 12-8-3_clean_R1  | 91                  | 69137188                  | 68027536.13                     | 3.099185072                        | 6.190505788 |
| 12-8-3_clean_R2  | 91                  |                           |                                 | 3.091320716                        |             |
| 13-1-2_clean_R1  | 91                  | 45128452                  | 44415422.46                     | 2.023981739                        | 4.041803444 |
| 13-1-2_clean_R2  | 91                  |                           |                                 | 2.017821705                        |             |
| 13-11-1_clean_R1 | 91                  | 52785984                  | 51978358.44                     | 2.369098305                        | 4.730030618 |
| 13-11-1_clean_R2 | 91                  |                           |                                 | 2.360932313                        |             |
| 13-2-2_clean_R1  | 91                  | 52614348                  | 51909315.74                     | 2.365464795                        | 4.723747732 |
| 13-2-2_clean_R2  | 91                  |                           |                                 | 2.358282937                        |             |
| 13-4-2_clean_R1  | 91                  | 53792858                  | 53039757.99                     | 2.419183169                        | 4.826617977 |
| 13-4-2_clean_R2  | 91                  |                           |                                 | 2.407434808                        |             |
| 13-6-1_clean_R1  | 91                  | 55830084                  | 55073586.36                     | 2.508261435                        | 5.011696359 |
| 13-6-1_clean_R2  | 91                  |                           |                                 | 2.503434924                        |             |
| 14-1-1_clean_R1  | 91                  | 54143698                  | 53328835.35                     | 2.431512262                        | 4.852924016 |
| 14-1-1_clean_R2  | 91                  |                           |                                 | 2.421411755                        |             |
| 14-2-2_clean_R1  | 91                  | 50777166                  | 50132295.99                     | 2.280788432                        | 4.562038935 |
| 14-2-2_clean_R2  | 91                  |                           |                                 | 2.281250504                        |             |
| 14-3-2_clean_R1  | 91                  | 49163634                  | 48362266.77                     | 2.204957029                        | 4.400966276 |
| 14-3-2_clean_R2  | 91                  |                           |                                 | 2.196009247                        |             |
| 14-5-1_clean_R1  | 91                  | 52659720                  | 51861925.24                     | 2.361514611                        | 4.719435197 |
| 14-5-1_clean_R2  | 91                  |                           |                                 | 2.357920586                        |             |
| 14-7-1_clean_R1  | 91                  | 44671582                  | 43932267.32                     | 2.003084905                        | 3.997836326 |
| 14-7-1_clean_R2  | 91                  |                           |                                 | 1.994751421                        |             |
| 15-1-2_clean_R1  | 91                  | 50911300                  | 50094173.64                     | 2.285655177                        | 4.558569801 |
| 15-1-2_clean_R2  | 91                  |                           |                                 | 2.272914624                        |             |
| 15-2-1_clean_R1  | 91                  | 47301510                  | 46513939.86                     | 2.121226756                        | 4.232768527 |
| 15-2-1_clean_R2  | 91                  |                           |                                 | 2.111541771                        |             |
| 15-3-1_clean_R1  | 91                  | 51289686                  | 50458793.09                     | 2.300775815                        | 4.591750171 |
| 15-3-1_clean_R2  | 91                  |                           |                                 | 2.290974356                        |             |
| 15-4-1_clean_R1  | 91                  | 48541086                  | 47798407.38                     | 2.177698741                        | 4.349655072 |
| 15-4-1_clean_R2  | 91                  |                           |                                 | 2.171956331                        |             |
| 15-6-1_clean_R1  | 91                  | 53753602                  | 52874730.61                     | 2.409102058                        | 4.811600485 |
| 15-6-1_clean_R2  | 91                  |                           |                                 | 2.402498428                        |             |
| 15-7-2_clean_R1  | 91                  | 47950364                  | 47163978.03                     | 2.150542658                        | 4.291922001 |
| 15-7-2_clean_R2  | 91                  |                           |                                 | 2.141379343                        |             |
| 16-3-3_clean_R1  | 91                  | 52032452                  | 51106274.35                     | 2.332911408                        | 4.650670966 |
| 16-3-3_clean_R2  | 91                  |                           |                                 | 2.317759558                        |             |
| 16-4-3_clean_R1  | 91                  | 48341364                  | 47618660.61                     | 2.167638847                        | 4.333298115 |
| 16-4-3_clean_R2  | 91                  |                           |                                 | 2.165659268                        |             |

| Samples         | Length of read (bp) | Number of reads sequenced | Number of reads with quality>20 | Single-ended kept data volume (Gb) | Total G     |
|-----------------|---------------------|---------------------------|---------------------------------|------------------------------------|-------------|
| 2-1-1_clean_R1  | 91                  | 53870984                  | 53046757.94                     | 2.420000424                        | 4.827254973 |
| 2-1-1_clean_R2  | 91                  |                           |                                 | 2.407254549                        |             |
| 2-12-1_clean_R1 | 91                  | 45854618                  | 45153042.34                     | 2.056341173                        | 4.108926853 |
| 2-12-1_clean_R2 | 91                  |                           |                                 | 2.05258568                         |             |
| 2-13-1_clean_R1 | 91                  | 45077100                  | 44344597.13                     | 2.021678635                        | 4.035358338 |
| 2-13-1_clean_R2 | 91                  |                           |                                 | 2.013679703                        |             |
| 2-14-1_clean_R1 | 91                  | 46337476                  | 45572907.65                     | 2.077573173                        | 4.147134596 |
| 2-14-1_clean_R2 | 91                  |                           |                                 | 2.069561423                        |             |
| 2-16-1_clean_R1 | 91                  | 44815886                  | 44116758.18                     | 2.008943795                        | 4.014624994 |
| 2-16-1_clean_R2 | 91                  |                           |                                 | 2.005681199                        |             |
| 2-2-1_clean_R1  | 91                  | 50457256                  | 49677691.39                     | 2.262286393                        | 4.520669917 |
| 2-2-1_clean_R2  | 91                  |                           |                                 | 2.258383524                        |             |
| 2-3-2_clean_R1  | 91                  | 52656540                  | 51771910.13                     | 2.360413656                        | 4.711243822 |
| 2-3-2_clean_R2  | 91                  |                           |                                 | 2.350830166                        |             |
| 2-4-1_clean_R1  | 91                  | 60477020                  | 59509387.68                     | 2.711254355                        | 5.415354279 |
| 2-4-1_clean_R2  | 91                  |                           |                                 | 2.704099924                        |             |
| 2-6-2_clean_R1  | 91                  | 51617110                  | 50884147.04                     | 2.313584685                        | 4.63045738  |
| 2-6-2_clean_R2  | 91                  |                           |                                 | 2.316872695                        |             |
| 2-7-2_clean_R1  | 91                  | 51821378                  | 51044057.33                     | 2.32321197                         | 4.645009217 |
| 2-7-2_clean_R2  | 91                  |                           |                                 | 2.321797247                        |             |
| 2-8-3_clean_R1  | 91                  | 64157416                  | 63169391.79                     | 2.878294154                        | 5.748414653 |
| 2-8-3_clean_R2  | 91                  |                           |                                 | 2.870120499                        |             |
| 3-1-2_clean_R1  | 91                  | 58343810                  | 57465735.66                     | 2.621991242                        | 5.229381945 |
| 3-1-2_clean_R2  | 91                  |                           |                                 | 2.607390703                        |             |
| 3-10-3_clean_R1 | 91                  | 59499040                  | 58463756.7                      | 2.669305432                        | 5.32020186  |
| 3-10-3_clean_R2 | 91                  |                           |                                 | 2.650896429                        |             |
| 3-11-2_clean_R1 | 91                  | 52398068                  | 51530879.97                     | 2.349304057                        | 4.689310078 |
| 3-11-2_clean_R2 | 91                  |                           |                                 | 2.34000602                         |             |
| 3-13-1_clean_R1 | 91                  | 51795180                  | 50958687.84                     | 2.321801816                        | 4.637240594 |
| 3-13-1_clean_R2 | 91                  |                           |                                 | 2.315438778                        |             |
| 3-14-2_clean_R1 | 91                  | 53487890                  | 52640106.94                     | 2.400113949                        | 4.790249732 |
| 3-14-2_clean_R2 | 91                  |                           |                                 | 2.390135783                        |             |
| 3-15-1_clean_R1 | 91                  | 56649612                  | 55646913.87                     | 2.546884414                        | 5.063869162 |
| 3-15-1_clean_R2 | 91                  |                           |                                 | 2.516984748                        |             |
| 3-3-2_clean_R1  | 91                  | 54891848                  | 53961431.18                     | 2.462612977                        | 4.910490237 |
| 3-3-2_clean_R2  | 91                  |                           |                                 | 2.44787726                         |             |
| 3-6-1_clean_R1  | 91                  | 46114594                  | 45316811.52                     | 2.069678316                        | 4.123829849 |
| 3-6-1_clean_R2  | 91                  |                           |                                 | 2.054151532                        |             |
| 3-7-1_clean_R1  | 91                  | 47519114                  | 46592491.28                     | 2.128174408                        | 4.239916706 |
| 3-7-1_clean_R2  | 91                  |                           |                                 | 2.111742298                        |             |
| 3-8-2_clean_R1  | 91                  | 53540982                  | 52687003.34                     | 2.402496298                        | 4.794517304 |
| 3-8-2_clean_R2  | 91                  |                           |                                 | 2.392021005                        |             |
| 4-1-1_clean_R1  | 91                  | 50852730                  | 50028915.77                     | 2.280711886                        | 4.552631335 |

| Samples         | Length of read (bp) | Number of reads sequenced | Number of reads with quality>20 | Single-ended kept data volume (Gb) | Total G     |
|-----------------|---------------------|---------------------------|---------------------------------|------------------------------------|-------------|
| 4-1-1_clean_R2  | 91                  |                           |                                 |                                    |             |
| 4-11-2_clean_R1 | 91                  | 47547728                  | 46794096.51                     | 2.131402984                        | 4.258262783 |
| 4-11-2_clean_R2 | 91                  |                           |                                 | 2.126859799                        |             |
| 4-12-3_clean_R1 | 91                  | 47858396                  | 47083089.98                     | 2.145764686                        | 4.284561189 |
| 4-12-3_clean_R2 | 91                  |                           |                                 | 2.138796503                        |             |
| 4-15-3_clean_R1 | 91                  | 53290822                  | 52443497.93                     | 2.390058728                        | 4.772358312 |
| 4-15-3_clean_R2 | 91                  |                           |                                 | 2.382299584                        |             |
| 4-2-2_clean_R1  | 91                  | 51174676                  | 50309823.98                     | 2.29491811                         | 4.578193982 |
| 4-2-2_clean_R2  | 91                  |                           |                                 | 2.283275871                        |             |
| 4-3-1_clean_R1  | 91                  | 53280282                  | 52502389.88                     | 2.392010268                        | 4.777717479 |
| 4-3-1_clean_R2  | 91                  |                           |                                 | 2.385707211                        |             |
| 4-4-1_clean_R1  | 91                  | 57682674                  | 56852043.49                     | 2.587555347                        | 5.173535958 |
| 4-4-1_clean_R2  | 91                  |                           |                                 | 2.58598061                         |             |
| 4-7-2_clean_R1  | 91                  | 51224998                  | 50413081.78                     | 2.303234708                        | 4.587590442 |
| 4-7-2_clean_R2  | 91                  |                           |                                 | 2.284355735                        |             |
| 4-8-1_clean_R1  | 91                  | 56210042                  | 55437153.92                     | 2.521239603                        | 5.044781007 |
| 4-8-1_clean_R2  | 91                  |                           |                                 | 2.523541404                        |             |
| 4-9-1_clean_R1  | 91                  | 51765188                  | 51043063.63                     | 2.323283756                        | 4.64491879  |
| 4-9-1_clean_R2  | 91                  |                           |                                 | 2.321635034                        |             |
| 5-11-1_clean_R1 | 91                  | 53008724                  | 52285154.92                     | 2.382954179                        | 4.757949097 |
| 5-11-1_clean_R2 | 91                  |                           |                                 | 2.374994919                        |             |
| 5-12-1_clean_R1 | 91                  | 58720692                  | 57836945.59                     | 2.633317689                        | 5.263162048 |
| 5-12-1_clean_R2 | 91                  |                           |                                 | 2.62984436                         |             |
| 5-15-1_clean_R1 | 91                  | 54372922                  | 53500236.6                      | 2.440569384                        | 4.868521531 |
| 5-15-1_clean_R2 | 91                  |                           |                                 | 2.427952147                        |             |
| 5-16-1_clean_R1 | 91                  | 47355246                  | 46633078.5                      | 2.124498401                        | 4.243610143 |
| 5-16-1_clean_R2 | 91                  |                           |                                 | 2.119111742                        |             |
| 5-2-2_clean_R1  | 91                  | 52315292                  | 51486094.62                     | 2.346068807                        | 4.685234611 |
| 5-2-2_clean_R2  | 91                  |                           |                                 | 2.339165804                        |             |
| 5-7-1_clean_R1  | 91                  | 48898642                  | 48177387.03                     | 2.192849821                        | 4.38414222  |
| 5-7-1_clean_R2  | 91                  |                           |                                 | 2.191292399                        |             |
| 5-8-3_clean_R1  | 91                  | 51466388                  | 50707258.78                     | 2.31291749                         | 4.614360549 |
| 5-8-3_clean_R2  | 91                  |                           |                                 | 2.301443059                        |             |
| 5-9-1_clean_R1  | 91                  | 47441438                  | 46798606.52                     | 2.126854223                        | 4.258673193 |
| 5-9-1_clean_R2  | 91                  |                           |                                 | 2.13181897                         |             |
| 6-13-1_clean_R1 | 91                  | 59205960                  | 58237942.55                     | 2.654810048                        | 5.299652772 |
| 6-13-1_clean_R2 | 91                  |                           |                                 | 2.644842725                        |             |
| 6-16-1_clean_R1 | 91                  | 50613144                  | 49793211.07                     | 2.271578638                        | 4.531182207 |
| 6-16-1_clean_R2 | 91                  |                           |                                 | 2.259603569                        |             |
| 6-3-1_clean_R1  | 91                  | 53977590                  | 53192216.07                     | 2.422087816                        | 4.840491662 |
| 6-3-1_clean_R2  | 91                  |                           |                                 | 2.418403846                        |             |
| 6-7-2_clean_R1  | 91                  | 46811626                  | 46032212.43                     | 2.099896984                        | 4.188931331 |
| 6-7-2_clean_R2  | 91                  |                           |                                 | 2.089034347                        |             |

| Samples         | Length of read (bp) | Number of reads sequenced | Number of reads with quality>20 | Single-ended kept data volume (Gb) | Total G     |
|-----------------|---------------------|---------------------------|---------------------------------|------------------------------------|-------------|
| 6-8-1_clean_R1  | 91                  | 48768920                  | 47954479.04                     | 2.187920058                        | 4.363857592 |
| 6-8-1_clean_R2  | 91                  |                           |                                 | 2.175937534                        |             |
| 6-9-1_clean_R1  | 91                  | 51424944                  | 50679282.31                     | 2.311756933                        | 4.61181469  |
| 6-9-1_clean_R2  | 91                  |                           |                                 | 2.300057758                        |             |
| 7-1-2_clean_R1  | 91                  | 48600802                  | 47806178.89                     | 2.178608711                        | 4.350362279 |
| 7-1-2_clean_R2  | 91                  |                           |                                 | 2.171753568                        |             |
| 7-11-1_clean_R1 | 91                  | 47116372                  | 46357798.41                     | 2.114210556                        | 4.218559655 |
| 7-11-1_clean_R2 | 91                  |                           |                                 | 2.104349099                        |             |
| 7-16-1_clean_R1 | 91                  | 56069298                  | 55287131.29                     | 2.519773876                        | 5.031128948 |
| 7-16-1_clean_R2 | 91                  |                           |                                 | 2.511355071                        |             |
| 7-3-1_clean_R1  | 91                  | 55733924                  | 54903488.53                     | 2.505462819                        | 4.996217456 |
| 7-3-1_clean_R2  | 91                  |                           |                                 | 2.490754637                        |             |
| 7-4_clean_R1    | 91                  | 48767910                  | 47977869.86                     | 2.187874746                        | 4.365986157 |
| 7-4_clean_R2    | 91                  |                           |                                 | 2.178111411                        |             |
| 7-5-1_clean_R1  | 91                  | 52993386                  | 52166689.18                     | 2.377924516                        | 4.747168715 |
| 7-5-1_clean_R2  | 91                  |                           |                                 | 2.369244199                        |             |
| 7-7-1_clean_R1  | 91                  | 46613738                  | 45823635.14                     | 2.090807943                        | 4.169950798 |
| 7-7-1_clean_R2  | 91                  |                           |                                 | 2.079142855                        |             |
| 8-1-1_clean_R1  | 91                  | 54155118                  | 53291343.87                     | 2.430300276                        | 4.849512292 |
| 8-1-1_clean_R2  | 91                  |                           |                                 | 2.419212016                        |             |
| 8-11-2_clean_R1 | 91                  | 50050552                  | 49212205.25                     | 2.244506994                        | 4.478310678 |
| 8-11-2_clean_R2 | 91                  |                           |                                 | 2.233803684                        |             |
| 8-12-3_clean_R1 | 91                  | 57584698                  | 56620154.31                     | 2.582636275                        | 5.152434042 |
| 8-12-3_clean_R2 | 91                  |                           |                                 | 2.569797767                        |             |
| 8-16-1_clean_R1 | 91                  | 56073332                  | 55209802.69                     | 2.51816923                         | 5.024092045 |
| 8-16-1_clean_R2 | 91                  |                           |                                 | 2.505922814                        |             |
| 8-2-2_clean_R1  | 91                  | 56328498                  | 55477937.68                     | 2.530397236                        | 5.048492329 |
| 8-2-2_clean_R2  | 91                  |                           |                                 | 2.518095092                        |             |
| 8-3-1_clean_R1  | 91                  | 52879772                  | 52017831.72                     | 2.368254961                        | 4.733622686 |
| 8-3-1_clean_R2  | 91                  |                           |                                 | 2.365367725                        |             |
| 8-7-1_clean_R1  | 91                  | 46245356                  | 45385192.38                     | 2.073863741                        | 4.130052506 |
| 8-7-1_clean_R2  | 91                  |                           |                                 | 2.056188766                        |             |
| 9-1-2_clean_R1  | 91                  | 51036932                  | 50087645.06                     | 2.282935557                        | 4.557975701 |
| 9-1-2_clean_R2  | 91                  |                           |                                 | 2.275040144                        |             |
| 9-13-1_clean_R1 | 91                  | 45771570                  | 45075842.14                     | 2.052825163                        | 4.101901634 |
| 9-13-1_clean_R2 | 91                  |                           |                                 | 2.049076471                        |             |
| 9-16-2_clean_R1 | 91                  | 47931700                  | 47064136.23                     | 2.150141768                        | 4.282836397 |
| 9-16-2_clean_R2 | 91                  |                           |                                 | 2.132694629                        |             |
| 9-2-1_clean_R1  | 91                  | 48360750                  | 47623248.56                     | 2.169168244                        | 4.333715619 |
| 9-2-1_clean_R2  | 91                  |                           |                                 | 2.164547375                        |             |
| 9-3-1_clean_R1  | 91                  | 44194388                  | 43345855.75                     | 1.982089575                        | 3.944472873 |
| 9-3-1_clean_R2  | 91                  |                           |                                 | 1.962383298                        |             |
| 9-4-3_clean_R1  | 91                  | 48250214                  | 47478210.58                     | 2.163990735                        | 4.320517162 |

| Samples           | Length of read (bp) | Number of reads sequenced | Number of reads with quality>20 | Single-ended kept data volume (Gb) | Total G     |
|-------------------|---------------------|---------------------------|---------------------------------|------------------------------------|-------------|
| 9-4-3_clean_R2    | 91                  |                           |                                 |                                    |             |
| 9-5-3_clean_R1    | 91                  | 57158366                  | 56255263.82                     | 2.563775633                        | 5.119229007 |
| 9-5-3_clean_R2    | 91                  |                           |                                 | 2.555453375                        |             |
| 9-6-1_clean_R1    | 91                  | 53443792                  | 52615413.22                     | 2.398135179                        | 4.788002603 |
| 9-6-1_clean_R2    | 91                  |                           |                                 | 2.389867424                        |             |
| 9-7-1_clean_R1    | 91                  | 50975670                  | 50307888.72                     | 2.294343541                        | 4.578017874 |
| 9-7-1_clean_R2    | 91                  |                           |                                 | 2.283674333                        |             |
| I-6-10-2_clean_R1 | 91                  | 48985258                  | 48228435.76                     | 2.19762563                         | 4.388787655 |
| I-6-10-2_clean_R2 | 91                  |                           |                                 | 2.191162025                        |             |
| QBD-2_clean_R1    | 91                  | 31192674                  | 30709187.55                     | 1.399396934                        | 2.794536067 |
| QBD-2_clean_R2    | 91                  |                           |                                 | 1.395139134                        |             |
| QBND-2_clean_R1   | 91                  | 53426130                  | 52675492.87                     | 2.398558092                        | 4.793469851 |
| QBND-2_clean_R2   | 91                  |                           |                                 | 2.394911759                        |             |
